# Supplementary figures and images for: S100a4+ alveolar macrophages accelerate the progression of precancerous atypical adenomatous hyperplasia by promoting the angiogenic function regulated by fatty acid metabolism
Source: eLife journal article supplement (doi:10.7554/elife.101731), 2024-12-06

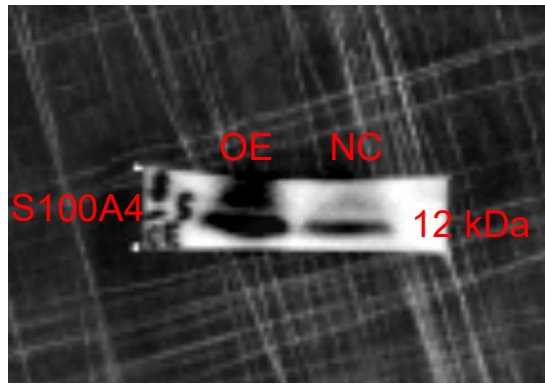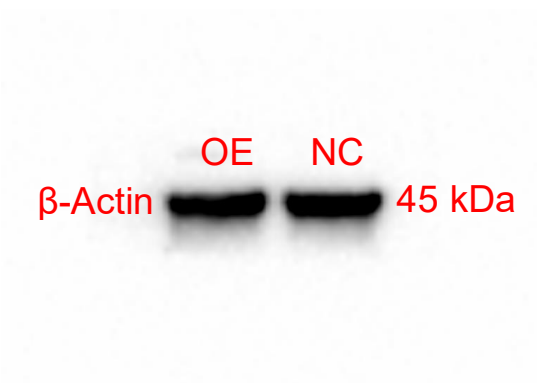

Supplement: fig5-data1 [file elife-101731-fig5-data1-v1.zip]

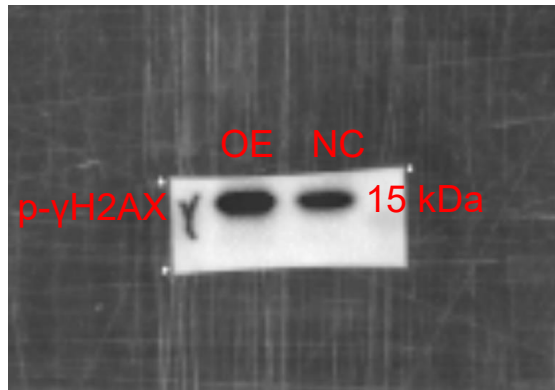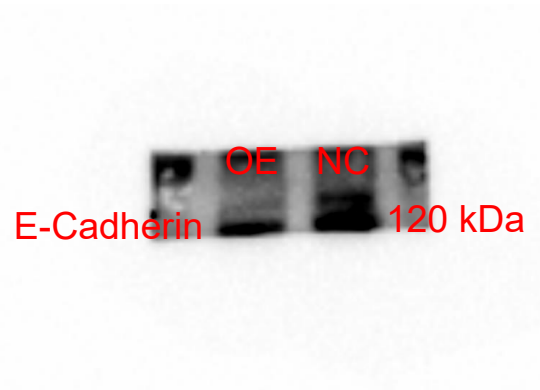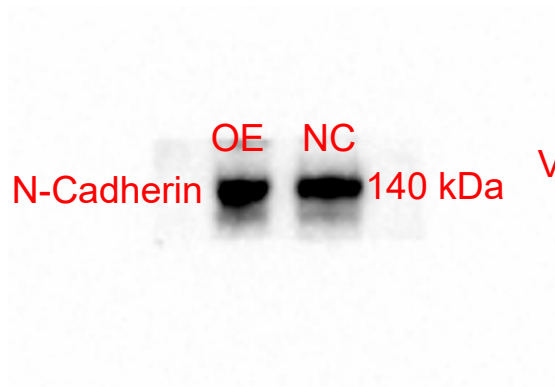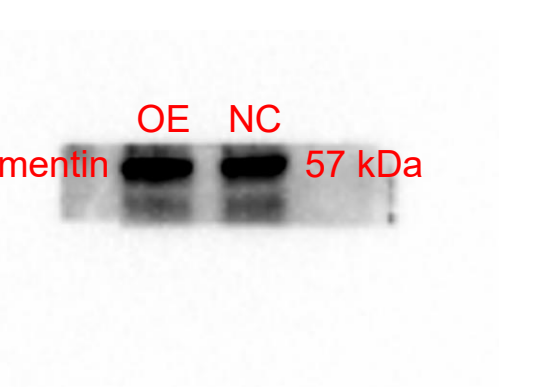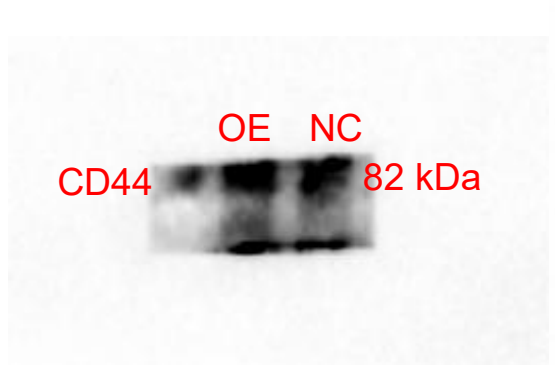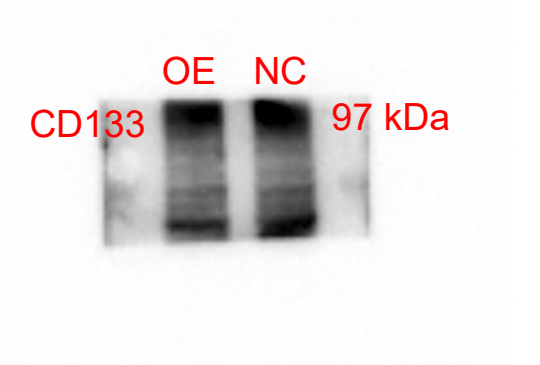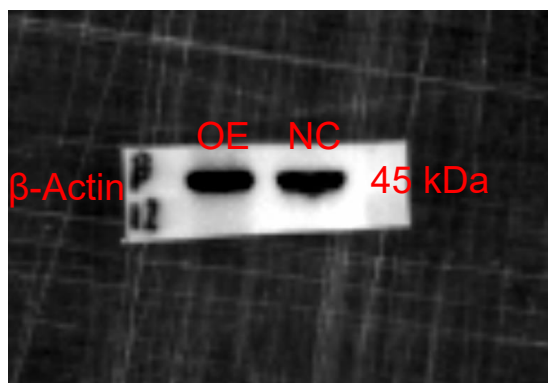

Supplement: fig5-data3 [file elife-101731-fig5-data3-v1.zip]

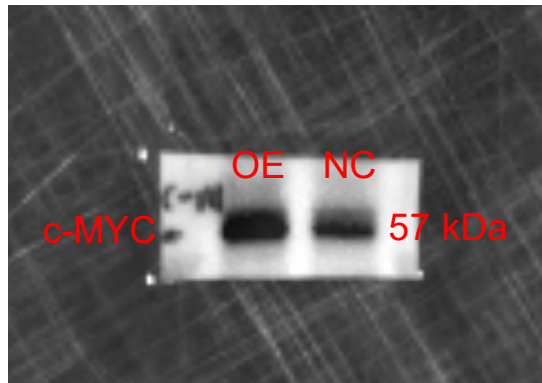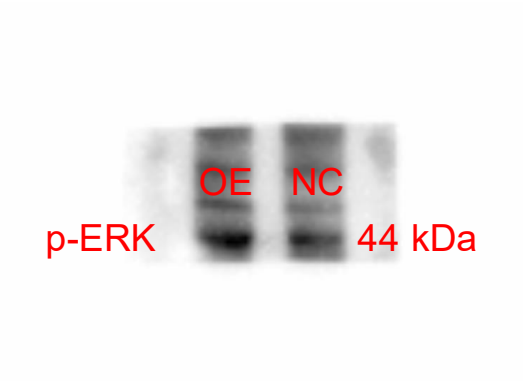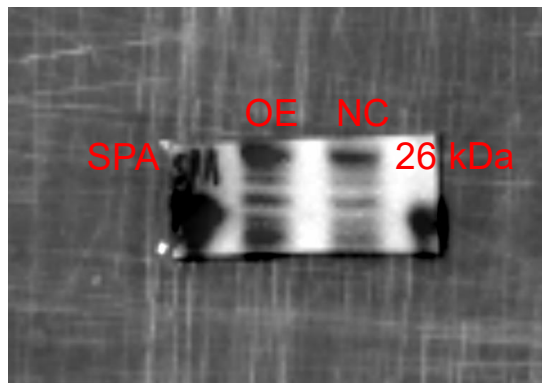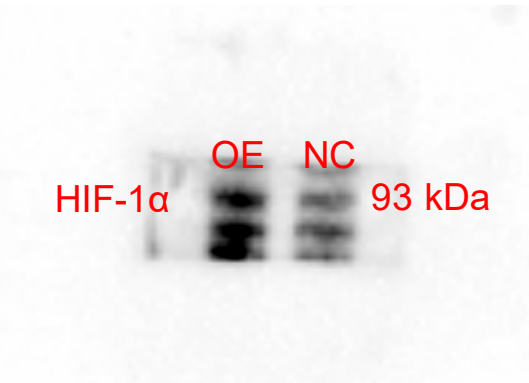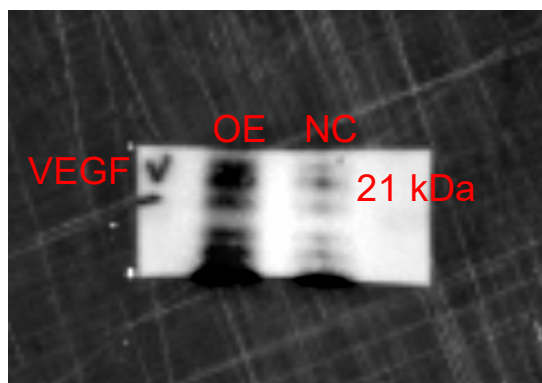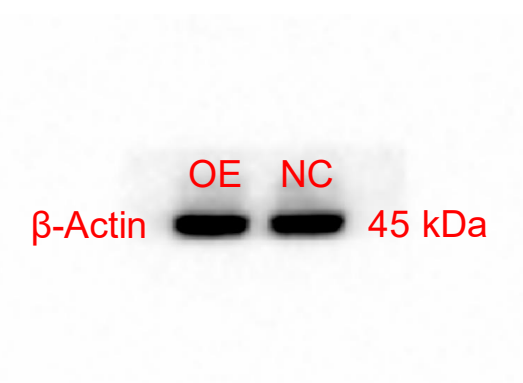

Supplement: fig5-data5 [file elife-101731-fig5-data5-v1.zip]

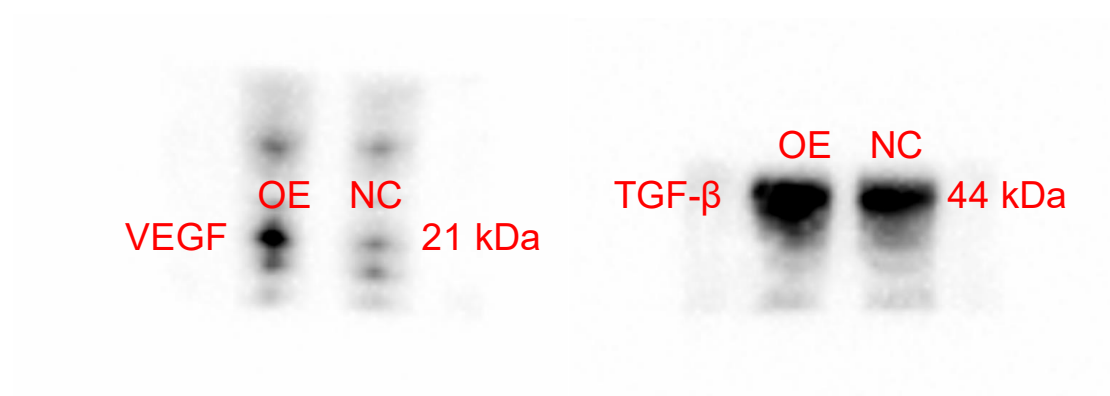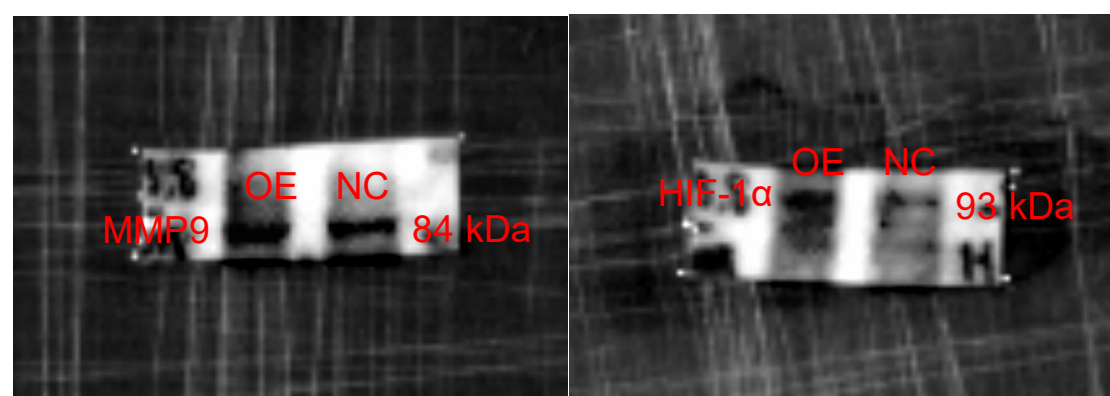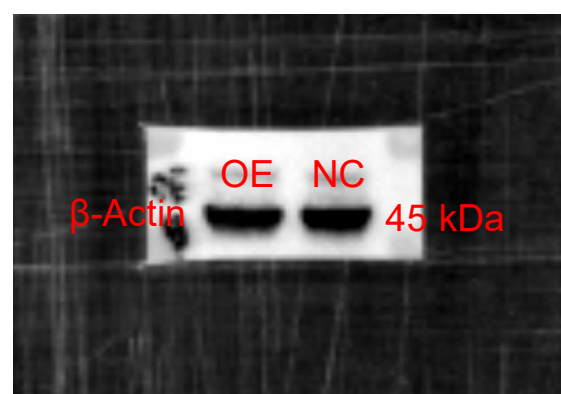

Supplement: fig5-data7 [file elife-101731-fig5-data7-v1.zip]

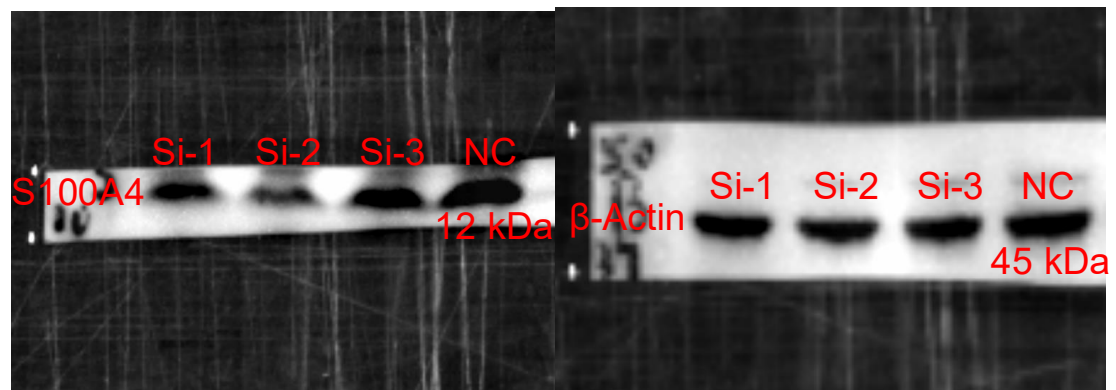

Supplement: fig5-figsupp1-data1 [file elife-101731-fig5-figsupp1-data1-v1.zip]

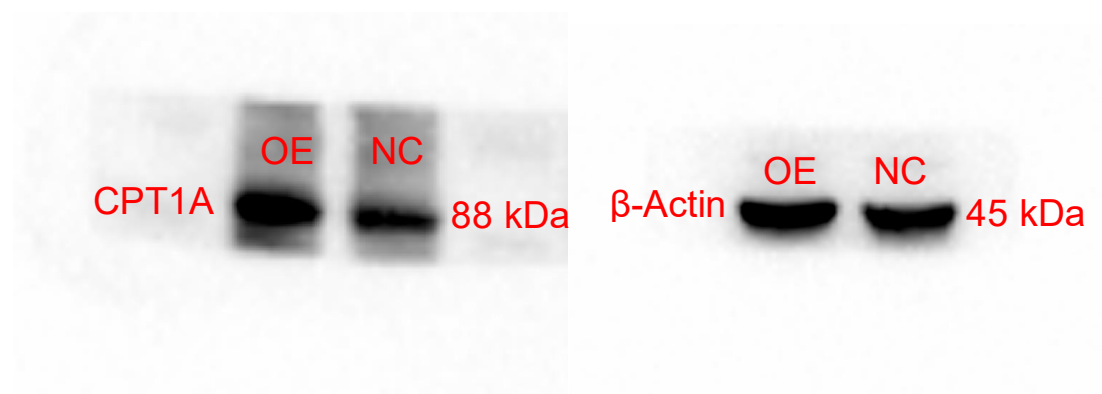

Supplement: fig6-data1 [file elife-101731-fig6-data1-v1.zip]

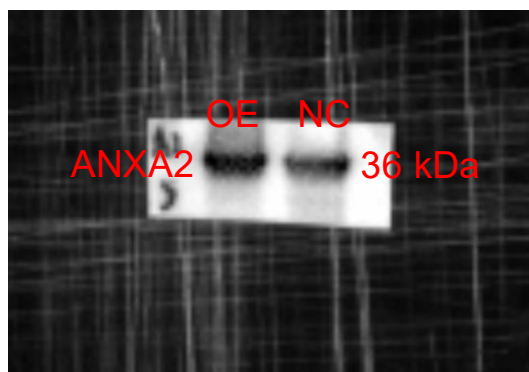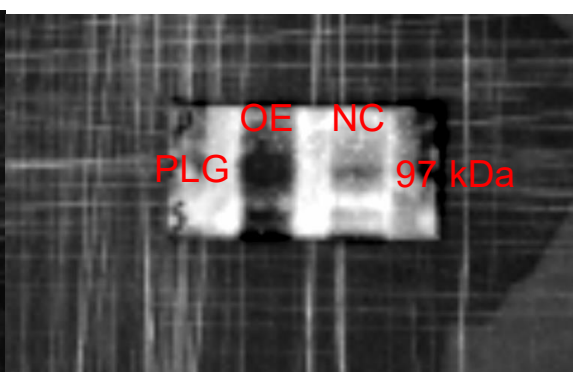

MH-S

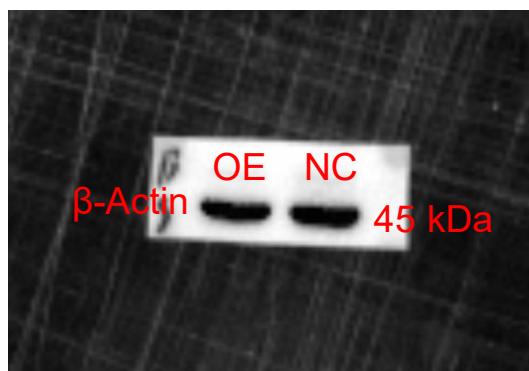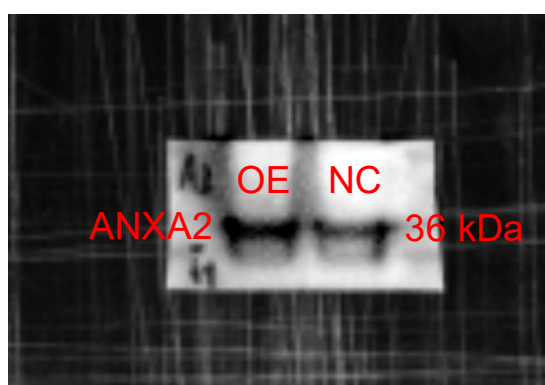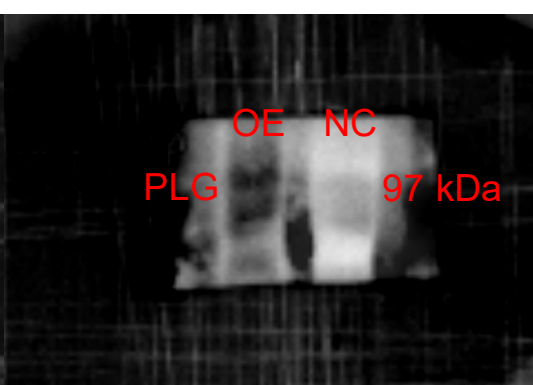

HUVEC

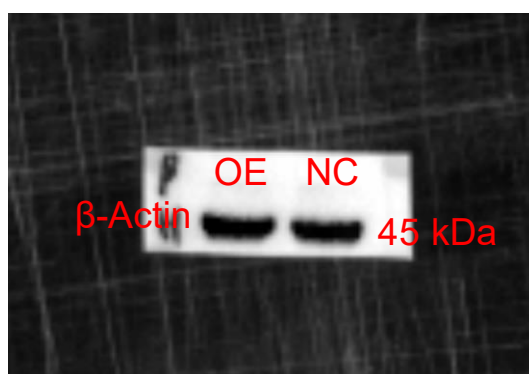

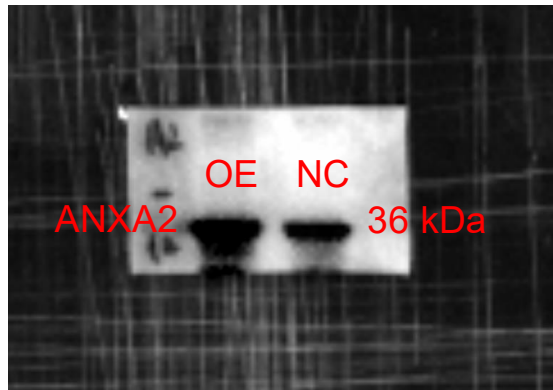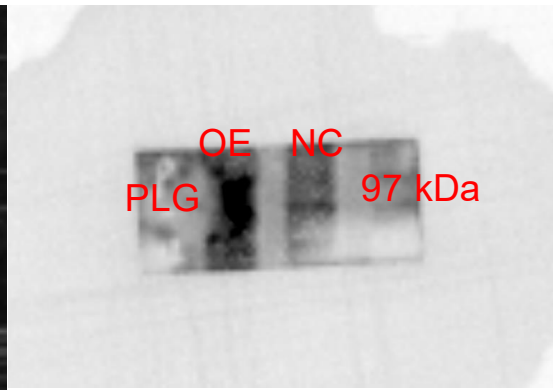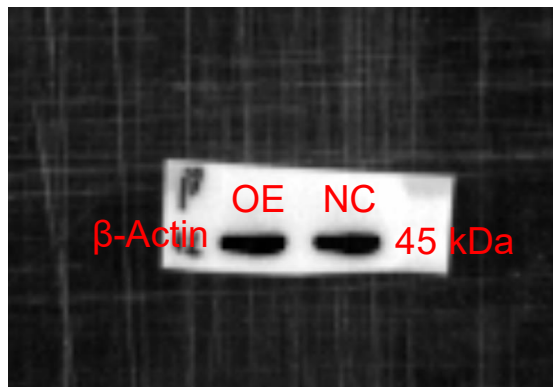

MLE12

Supplement: fig6-data3 [file elife-101731-fig6-data3-v1.zip]

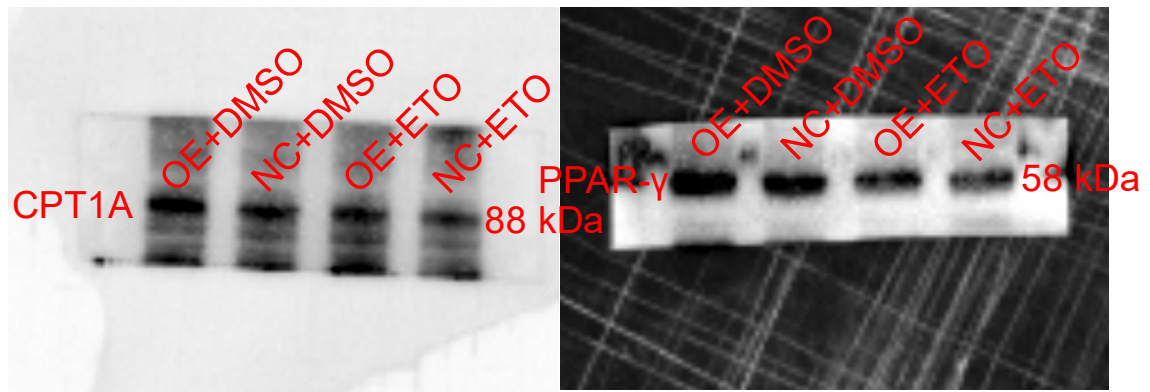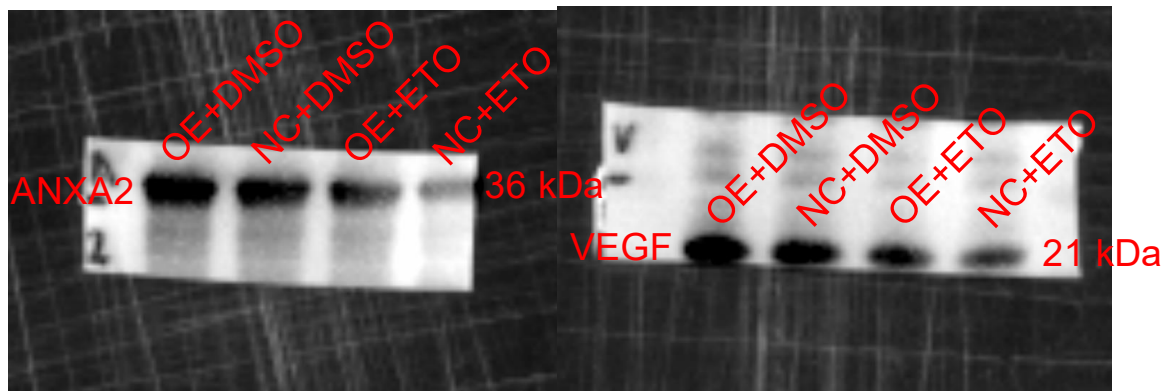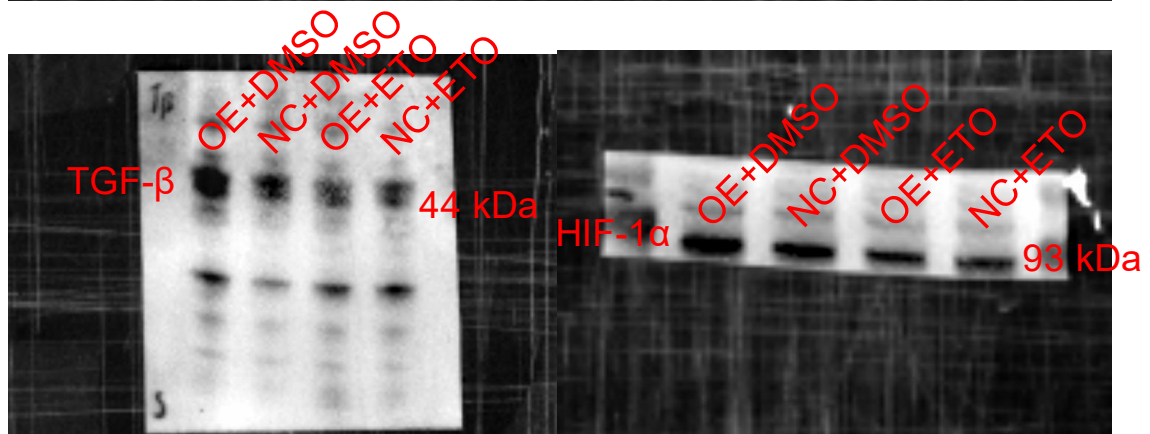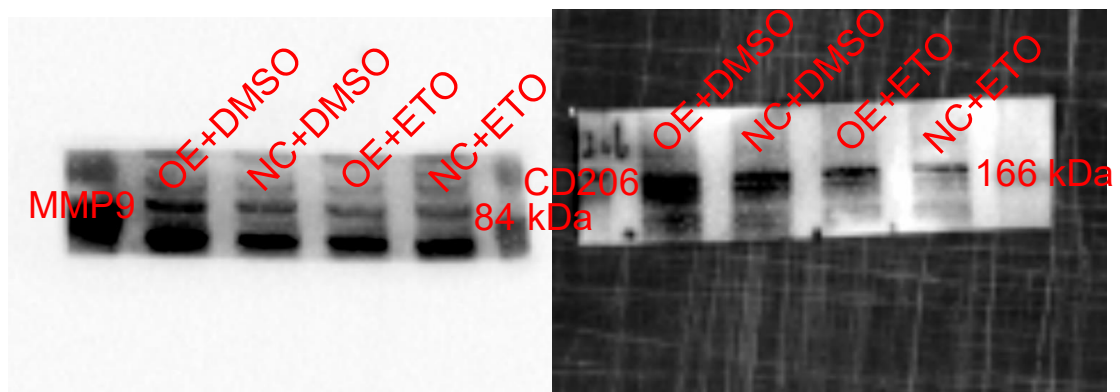

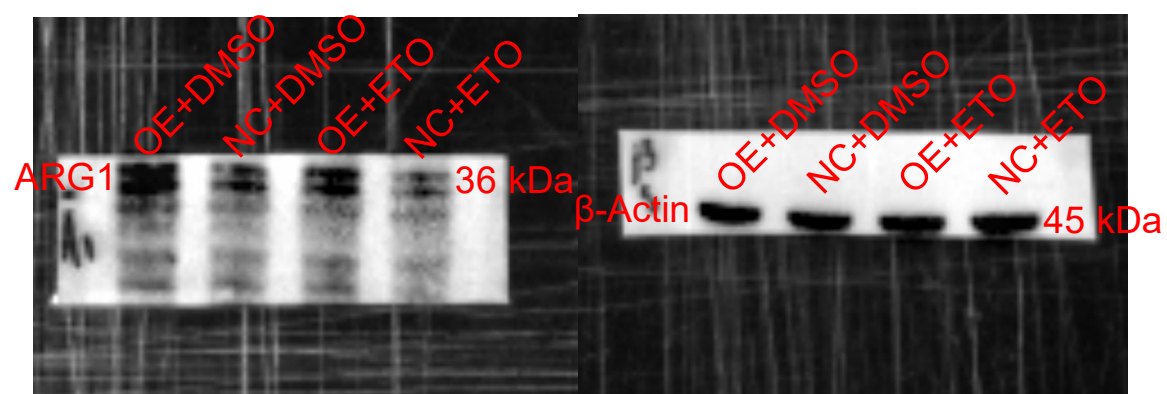

Supplement: fig6-data5 [file elife-101731-fig6-data5-v1.zip]

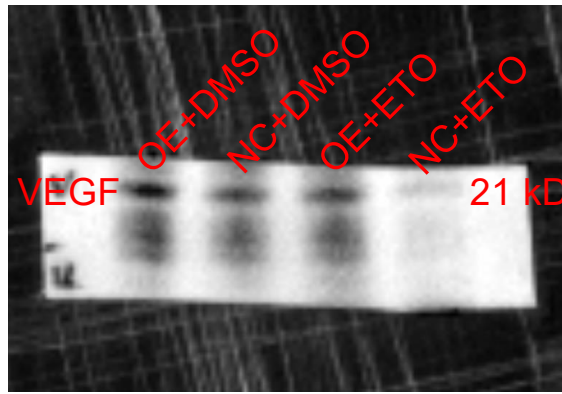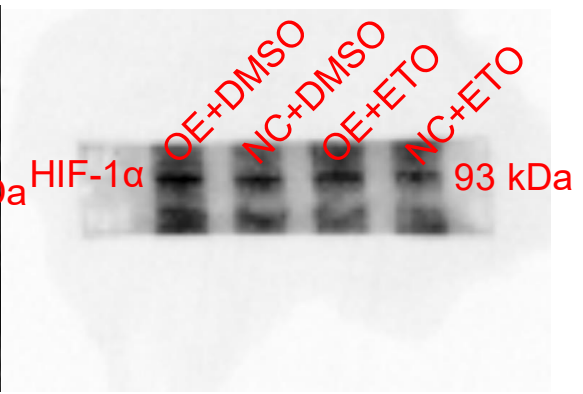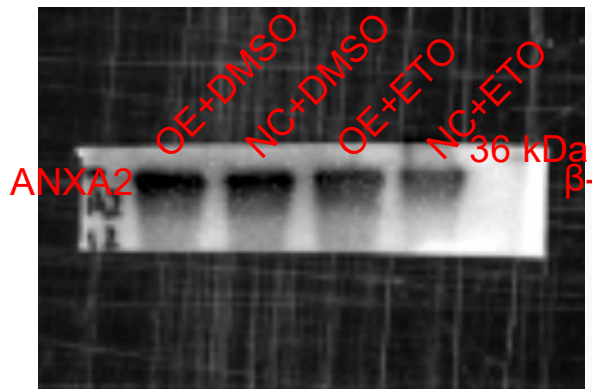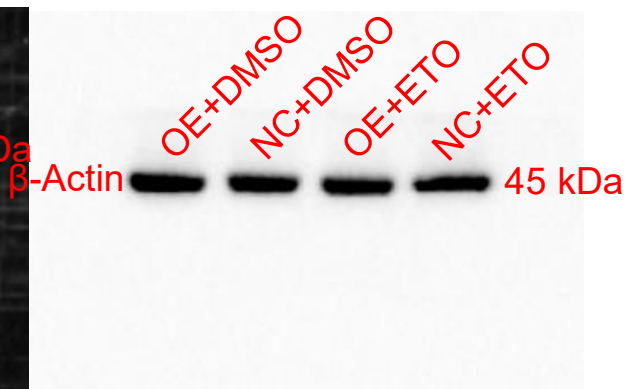

Supplement: fig6-data7 [file elife-101731-fig6-data7-v1.zip]
